# Supplementary material
Source: PubMed Central journal article supplement (PMC3919535)
Supplement: NIHMS534301-supplement-01.pdf [file NIHMS534301-supplement-01.pdf]

# Supporting information for: An Investigation of Ion-Pairing of Alkali Metal Halides in Aqueous Solutions Using the Electrical Conductivity and the Monte Carlo Computer Simulation Methods

Jure Gujt, Marija Bešter-Rogač, and Barbara Hribar-Lee

## Model

The Mercedes-Benz + dipole water model[5] (MB+dipole) was used to describe the water in the electrolyte solution. In this model, the water molecule is represented as a two-dimensional Lennard-Jones disk with three equally separated hydrogen bonding arms, and interacts with another water molecule through the potential (see Figure S1):

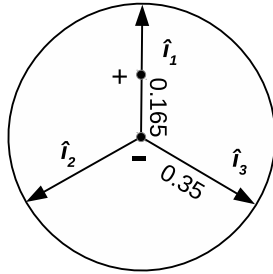

Figure S1: A MB + dipole water molecule has three hydrogen bonding arms, which are denoted as vectors:  $\hat{\mathbf{i}}_k$  ( $k=1, 2, 3$ ). There is a single negative charge placed in the centre of the molecule and a single positive charge on one of the hydrogen bonding arms  $0.165r_{HB}$  away from the centre.

$$U_{vv}(\mathbf{X}_i, \mathbf{X}_j) = U_{LJ}(r_{ij}) + U_{HB}(\mathbf{X}_i, \mathbf{X}_j) \quad (1)$$

$\mathbf{X}_i$  denotes the vector with coordinates and orientation of  $i$ 'th particle, and  $r_{ij}$  is the distance between centres of molecules  $i$  and  $j$ . Lennard-Jones 12-6 potential is:

$$U_{LJ}(r_{ij}) = 4\epsilon_{LJ} \left[ \left( \frac{\sigma_{LJ}}{r_{ij}} \right)^{12} - \left( \frac{\sigma_{LJ}}{r_{ij}} \right)^6 \right], \quad (2)$$

where  $\epsilon_{LJ}$  represents the depth of the potential well, and  $\sigma_{LJ}$  is Lennard-Jones diameter.

The hydrogen bond strength is a Gaussian function of the intermolecular distance and the angle between two hydrogen bonding arms:

$$U_{HB}(\mathbf{X}_i, \mathbf{X}_j) = \epsilon_{HB} G(r_{ij} - r_{HB}) \sum_{k,l=1}^3 G(\hat{\mathbf{i}}_k \cdot \hat{\mathbf{u}}_{ij} - 1) G(\hat{\mathbf{j}}_l \cdot \hat{\mathbf{u}}_{ij} + 1) \quad (3)$$

$G(x)$  is unnormalized Gaussian function:

$$G(x) = \exp(-x^2/2\sigma^2) \quad (4)$$

Unit vector  $\hat{\mathbf{i}}_k$  represents  $k$ 'th arm of  $i$ 'th molecule ( $k=1, 2, 3$ ).  $\hat{\mathbf{u}}_{ij}$ , which is also a unit vector is the direction vector of the line joining centres of  $i$ 'th and  $j$ 'th molecule. Parameters  $\epsilon_{HB} = -1$  and  $r_{HB} = 1$  determine the energy and the length of the optimal hydrogen bond. Value for model parameters are following:  $\sigma_{LJ} = 0.7 \cdot r_{HB} = 0.7$ ,  $\epsilon_{LJ} = 0.1 |\epsilon_{HB}| = 0.1$ , and  $\sigma = 0.085$ .

In addition, to describe the water-ion interaction, each water molecule has a dipole which is formed from a single negative charge in the center of a water molecule, and a single positive charge on one of hydrogen bonding arms ( $0, 185r_{HB}$  away from the edge) [5].

An ion interacts with the water molecule through the potential:

$$U_{iv}(\mathbf{X}_i, \mathbf{X}_j) = U_{LJ}(r_{ij}) + \sum_{+,-} U_{SC}(\mathbf{X}_i, \mathbf{X}_j) \quad (5)$$

where  $U_{LJ}$  is a Lennard-Jones potential (equation 2), and:

$$U_{SC} = z_i z_j |\epsilon_{HB}| \alpha \frac{\exp(-\kappa r_{ij})}{r_{ij}}, \quad (6)$$

Here the sum is taken over both charges on the water molecule.  $r_{ij}$  denotes distance between ion and charge on the water molecule in units of  $r_{HB}$ ,  $z$  is valence, and  $\kappa$  is screening constant, which value is 0.1. Parameter  $\alpha$  for interaction between water molecule and ion equals 2.27.

Contact parameter  $\sigma_{iw}$  is for each ion determined as the arithmetic mean of  $\sigma_i$  and  $\sigma_{LJ}$ . Index  $i$  refers to an ion and index  $LJ$  to the water molecule. Lennard-Jones radii for ions studied are in Table S1. The depth of the potential well is the same as for the water-water interaction, that is  $\epsilon_{LJ}$ .

Table S1: Lennard-Jones contact parameters[5] ( $\sigma_i$ ), radii of first hydration shells ( $r_h$ ), valences ( $z_i$ ), number of water molecules in first hydration shell ( $n_{\text{waters}}$ ), and number of hydrogen bonds between water molecules in the first hydration shell ( $n_{\text{H-bonds}}$ ) of investigated ions. Distances are given in reduced units.

| ion             | $\sigma_i$ | $r_h$ | $z_i$ | $n_{\text{waters}}$ | $n_{\text{H-bonds}}$ |
|-----------------|------------|-------|-------|---------------------|----------------------|
| Li <sup>+</sup> | 0.24       | 0.86  | 1     | 3.27 ± 0.01         | 0.93 ± 0.01          |
| Na <sup>+</sup> | 0.37       | 0.92  | 1     | 3.48 ± 0.01         | 1.13 ± 0.01          |
| K <sup>+</sup>  | 0.52       | 1.01  | 1     | 3.85 ± 0.01         | 1.55 ± 0.01          |
| Rb <sup>+</sup> | 0.58       | 1.08  | 1     | 4.23 ± 0.01         | 1.83 ± 0.01          |
| Cs <sup>+</sup> | 0.66       | 1.15  | 1     | 4.63 ± 0.01         | 2.16 ± 0.01          |
| Cl <sup>-</sup> | 0.71       | 1.12  | -1    | 4.34 ± 0.01         | 0.84 ± 0.01          |
| I <sup>-</sup>  | 0.85       | 1.23  | -1    | 4.80 ± 0.01         | 1.26 ± 0.02          |

In the contrast with previous studies using the MB + dipole model, where only a single ion was present in the system [5, 6, 7], a pair of positive and negative ion was considered here. Cation-anion interaction was taken to be of the same form as ion-dipole interaction (equation 5):

$$U_{ii}(r_{ij}) = U_{LJ}(r_{ij}) + U_{SC}(r_{ij}) \quad (7)$$

The contact parameter is the arithmetic mean of contact parameters for interacting ions and well depth is the same as in aforementioned cases. The parameter  $\alpha$  in the equation for the screened

Table S2: Parameters  $\alpha$  for studied salts.

| Ion pair | $\alpha$ |
|----------|----------|
| LiCl     | 1.65     |
| NaCl     | 1.74     |
| KCl      | 1.90     |
| RbCl     | 1.97     |
| CsCl     | 2.14     |
| NaI      | 1.73     |
| KI       | 2.30     |
| CsI      | 2.60     |

Coulomb potential (equation 6), which determines the strength of the electrostatic interaction between two ion, was set in such a way that the tendency for salt association would be in qualitative agreement with the results of more refined water models. [2, 1] The parameters  $\alpha$  used in this study are collected in main Table S2.

All quantities were calculated and are thus reported in reduced units. Energy and temperature were normalized to the energy of the optimal hydrogen bond ( $T^* = k_b T / |\epsilon_{HB}|$ ,  $E^* = E / |\epsilon_{HB}|$ ), distances were normalized to the length of the optimal hydrogen bond ( $r^* = r / r_{HB}$ ,  $V^* = V / r_{HB}^2$ ), and reduced pressure,  $p^*$ , was defined as  $p^* V^* = p V |\epsilon_{HB}|$ .

### Definitions of some relevant functions

Pair correlation functions were calculated for water-ion and cation-anion pairs. With the transformation of the ion-ion correlation function,  $g(r)$ , we calculated the potential of mean force,  $w(r)$ [3]:

$$w(r) = -k_b T \ln g(r) \quad (8)$$

Planar distribution function for water molecules,  $g(x, y)$ , around fixed ion pair was calculated as:

$$g(x, y) = \frac{\langle \rho(x, y) \rangle}{\langle \rho \rangle}, \quad (9)$$

where  $\langle \rho(x, y) \rangle$  denotes the average water density in the surface element  $dx dy$  with its centre in  $(x, y)$ , and  $\langle \rho \rangle$  is the average water density in the system.

With MB + dipole water model the orientation of water molecules with respect to the ion is also important. We define an angle between water molecule and ion with the angle between the vector of the water dipole moment and direction vector of the line joining centres of the water molecule and the ion (the direction is toward the ion, see Figure S2)[5]. The angular distribution function[5] for water molecules in the first hydration shell,  $P(\phi)$  is just the number of water molecules with the angle  $\phi$ , this is  $N$ . Formally it can be written as:

$$P(\phi) = N(\phi) \quad (10)$$

Example of angular distribution function can be seen in Figure S3.

The radius of the first hydration shell,  $r_h$ , is, in the case of single ions, the distance of the first minimum in ion-water pair correlation function. The definition of the first hydration shell for ion

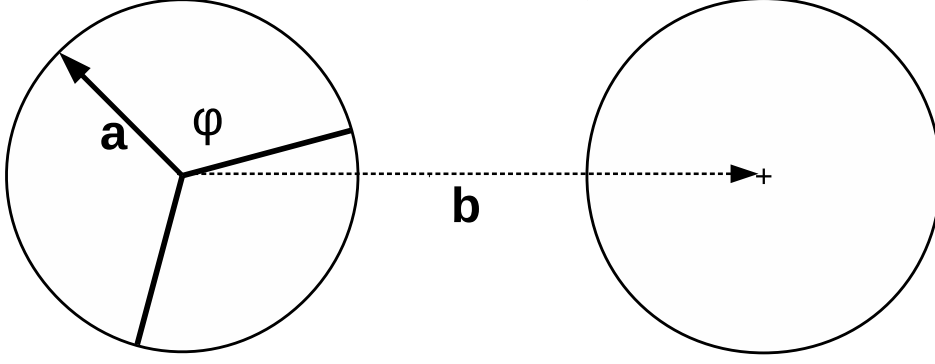

Figure S2: Definition of the angle between the water molecule and the ion. This is the angle  $\varphi$  between vectors **a** and **b**.

pairs is somewhat more complicated. When gathering statistics related to first hydration shell of the ion pair, both ions were fixed on abscissa axis. Let  $R$  be the shortest distance between edges of both ions and  $\sigma_i$  be the Lennard-Jones radius of an ion (index  $a$  refers to an anion and  $c$  to a cation), then abscissae of the ion centres are:

$$x_c = -\frac{1}{2}(\sigma_c + R) \quad (11)$$

$$x_a = \frac{1}{2}(\sigma_a + R) \quad (12)$$

The first hydration shell was defined as ellipse which centre has ordinate 0 and abscissa:

$$X_c = \frac{1}{2} \left( r_{ha} - r_{hc} + \frac{\sigma_a - \sigma_c}{2} \right) \quad (13)$$

Semi-major axis  $a$ , which lies in abscissa axis has length:

$$a = \frac{1}{2} \left( \frac{\sigma_a + \sigma_c}{2} + R + r_{ha} + r_{hc} \right) \quad (14)$$

Semi-minor axis  $b$ , has the same length as longer hydration radius ( $r_{ha}$  is the hydration radius for anion and  $r_{hc}$  for cation). A water molecule is said to be in the first hydration shell if coordinates of its centre  $(x, y)$  satisfy the following inequality:

$$\frac{(x - X_c)^2}{a^2} + \frac{y^2}{b^2} \leq 1 \quad (15)$$

Beside water molecules in the first hydration shell, number of hydrogen bonds formed by these waters (with water molecules in first hydration shell) was counted. A hydrogen bond was counted if absolute value of its energy exceeded one half of the absolute value of the energy of the optimal hydrogen bond.

First hydration shell which is ellipse (equation 15) was divided into three regions: First is “cation’s” region, where  $x \leq x_c$ ; second is “anion’s” region, where  $x \geq x_a$ ; and third is region between ions ( $x_c < x < x_a$ ). Water molecules in all three region must at the same time satisfy equation 15. On basis of this data we constructed the most probable configurations and orientations of waters in the first hydration shell around ion pair.

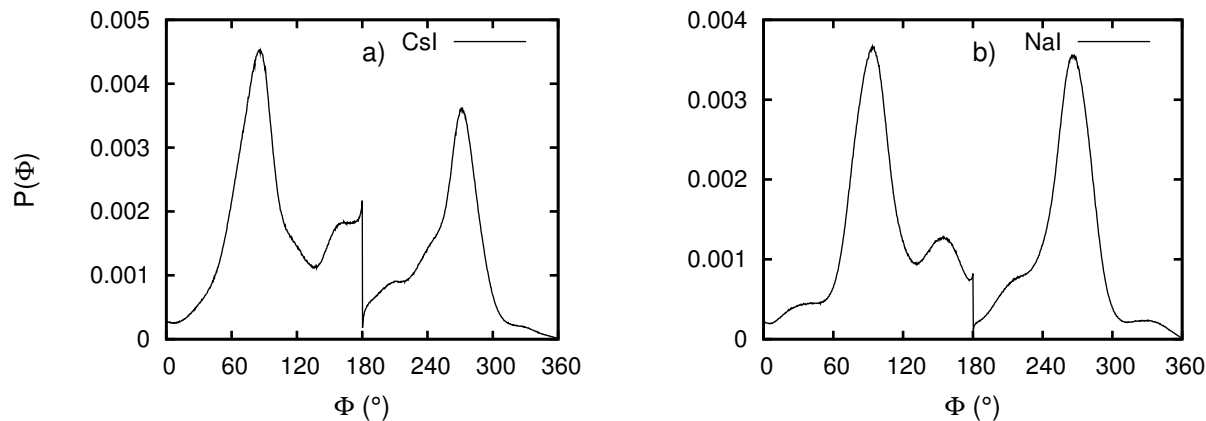

Figure S3: Example of angular distribution functions for water molecules between ions in CIP state for CsI (left) and NaI (right).

### Potentials of mean force for studied salts

We present the potential of mean force (pmf) between different pairs of ions. Figure S4 a) and b) shows the potential of mean force as a function of the distance between two ions for alkali chlorides, and alkali iodides, respectively, while Figure S5 shows the same for sodium halides and caesium halides. The curves are qualitatively the same as the ones presented in the literature [2, 1]. They show a distinctive first and the second minimum, indicating the most probable separations of the two ions in the solutions. The first minimum corresponds to the two ions being in contact (contact ion pair, CIP), while the second minimum correspond to the so-called solvent separated pair (SIP), in which the two ions are separated by one water molecule.

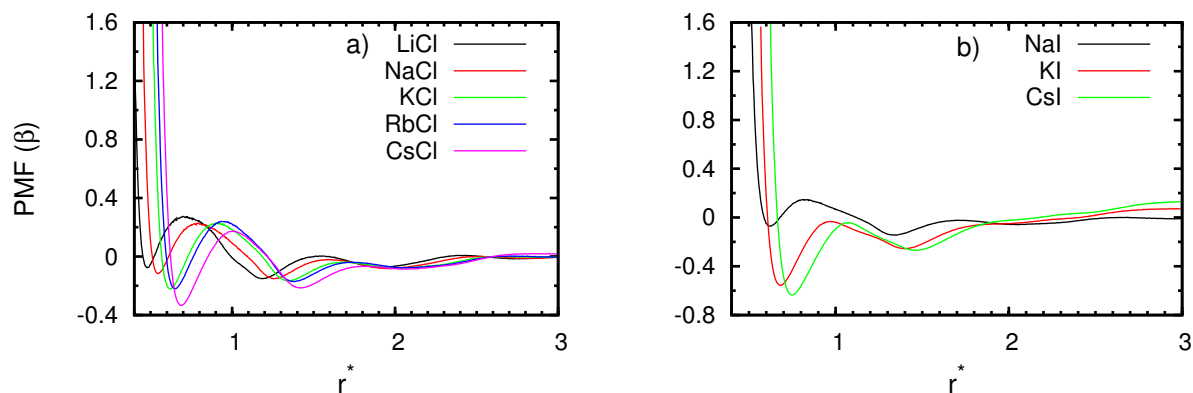

Figure S4: Potential of mean force as a function of  $r^*$  for chlorides (a) and iodides (b).

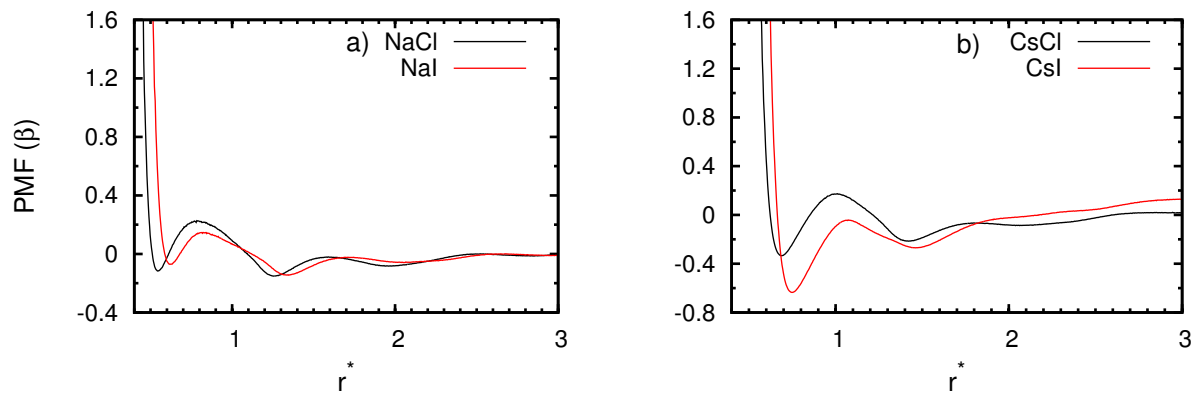

Figure S5: Potential of mean force as a function of  $r^*$  for sodium salts (a) and caesium salts (b).

## Experimental data

Table S3: Densities,  $d_s$ , viscosities,  $\eta$ , and relative permittivities,  $\epsilon$ , of water as a function of temperature,  $T$ .<sup>a, b</sup>

| T      | $d_s^b$  | $\eta \cdot 10^3,^c$ | $\epsilon^d$ |
|--------|----------|----------------------|--------------|
| 278.15 | 0.999967 | 1.5192               | 85.897       |
| 283.15 | 0.999702 | 1.3069               | 83.945       |
| 288.15 | 0.999102 | 1.1382               | 82.039       |
| 293.15 | 0.998206 | 1.0020               | 80.176       |
| 298.15 | 0.997048 | 0.8903               | 78.358       |
| 303.15 | 0.995651 | 0.7975               | 76.581       |
| 308.15 | 0.994036 | 0.7195               | 74.846       |
| 313.15 | 0.992219 | 0.6530               | 73.157       |

<sup>a</sup>Units:  $T$  in K;  $d_s$  in  $\text{kg}\cdot\text{dm}^{-3}$ ;  $\eta$  in Pa.s.;

<sup>b</sup>ref[4]

<sup>c</sup>ref[9]

<sup>d</sup>ref[10]

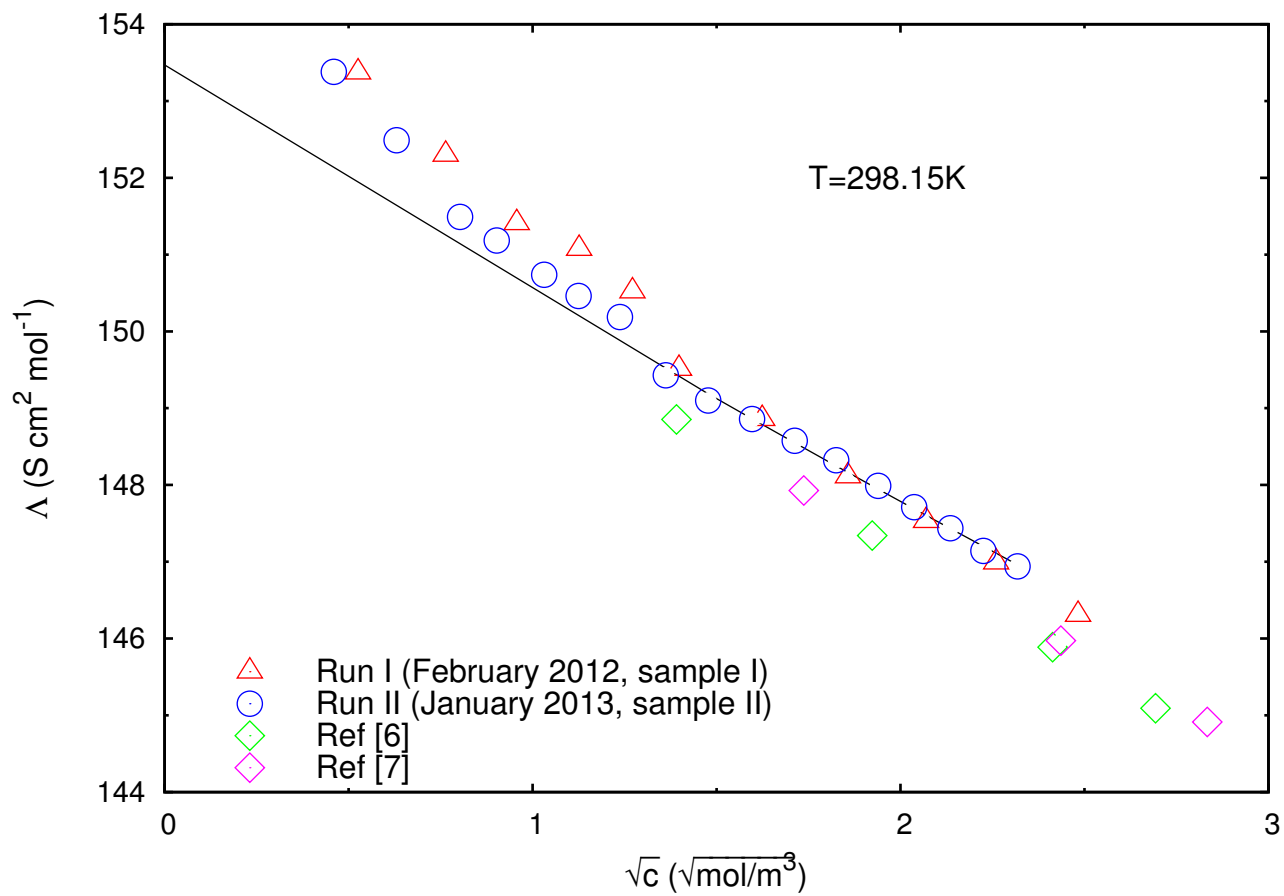

Figure S6: Molar conductivities,  $\Lambda$ , at 298.15 K of CsCl in water as obtained in two experiments and comparison with the available literature data.[8, 11] The line represents results of lcCM calculation on experimental data given in Table S2.

Table S4: Molar conductivities,  $\Lambda$ , as a function of molality,  $m$ , and density gradients,  $b$ , for solutions of investigated alkali metal halides in water.

| $T/K$                                                               |                                                        |         |         |         |         |         |         |         |
|---------------------------------------------------------------------|--------------------------------------------------------|---------|---------|---------|---------|---------|---------|---------|
|                                                                     | 278.15                                                 | 283.15  | 288.15  | 293.15  | 298.15  | 303.15  | 308.15  | 313.15  |
| $10^3 \cdot m/ \text{mol}\cdot\text{kg}^{-1}$                       | $\Lambda/\text{S}\cdot\text{cm}^2\cdot\text{mol}^{-1}$ |         |         |         |         |         |         |         |
| LiCl, $b/\text{kg}^2\cdot\text{dm}^{-3}\cdot\text{mol}^{-1}=0.0252$ |                                                        |         |         |         |         |         |         |         |
| 0.27056                                                             | 69.621                                                 | 79.954  | 90.470  | 101.957 | 113.723 | 126.037 | 138.733 | 151.679 |
| 0.57451                                                             | 69.300                                                 | 79.570  | 90.219  | 101.525 | 113.298 | 125.492 | 137.891 | 150.735 |
| 0.87074                                                             | 69.083                                                 | 79.320  | 89.739  | 100.911 | 112.712 | 124.814 | 137.312 | 150.157 |
| 1.21247                                                             | 68.746                                                 | 79.091  | 89.430  | 100.616 | 112.259 | 124.315 | 136.723 | 149.494 |
| 2.03874                                                             | 68.390                                                 | 78.520  | 89.124  | 100.222 | 111.732 | 123.434 | 135.756 | 148.571 |
| 3.11886                                                             | 67.870                                                 | 77.767  | 88.248  | 99.232  | 110.646 | 122.481 | 134.750 | 147.303 |
| 3.79452                                                             | 67.488                                                 | 77.462  | 87.925  | 98.884  | 110.398 | 122.208 | 134.346 | 146.818 |
| 5.11342                                                             | 67.172                                                 | 77.065  | 87.456  | 98.352  | 109.658 | 121.356 | 133.428 | 145.773 |
| 5.82796                                                             | 67.028                                                 | 76.923  | 87.288  | 98.139  | 109.404 | 121.070 | 133.061 | 145.352 |
| 6.55713                                                             | 66.709                                                 | 76.540  | 86.923  | 97.731  | 108.947 | 120.557 | 132.553 | 144.667 |
| KCl, $b/\text{kg}^2\cdot\text{dm}^{-3}\cdot\text{mol}^{-1}=0.0468$  |                                                        |         |         |         |         |         |         |         |
| 1.10918                                                             | 92.466                                                 | 105.327 | 118.675 | 132.569 | 146.876 | 161.582 | 176.649 | 192.005 |
| 1.52305                                                             | 92.140                                                 | 104.922 | 118.213 | 132.040 | 146.302 | 160.834 | 175.838 | 191.110 |
| 1.90376                                                             | 91.868                                                 | 104.610 | 117.863 | 131.549 | 145.741 | 160.335 | 175.231 | 190.543 |
| 2.32753                                                             | 91.588                                                 | 104.214 | 117.391 | 131.136 | 145.328 | 159.867 | 174.712 | 189.881 |
| 2.75233                                                             | 91.246                                                 | 103.928 | 117.111 | 130.797 | 144.992 | 159.485 | 174.210 | 189.415 |
| 3.14459                                                             | 91.156                                                 | 103.781 | 116.912 | 130.547 | 144.670 | 159.110 | 173.877 | 189.015 |
| 3.55644                                                             | 90.913                                                 | 103.529 | 116.654 | 130.267 | 144.364 | 158.795 | 173.516 | 188.607 |
| 4.06421                                                             | 90.734                                                 | 103.318 | 116.384 | 129.985 | 144.001 | 158.381 | 173.053 | 188.012 |
| 4.5035                                                              | 90.552                                                 | 103.110 | 116.146 | 129.703 | 143.683 | 158.028 | 172.676 | 187.626 |
| 4.95608                                                             | 90.371                                                 | 102.885 | 115.912 | 129.451 | 143.401 | 157.712 | 172.372 | 186.857 |
| 5.47657                                                             | 90.160                                                 | 102.653 | 115.653 | 129.177 | 143.117 | 157.405 | 171.590 | 186.461 |
| RbCl, $b/\text{kg}^2\cdot\text{dm}^{-3}\cdot\text{mol}^{-1}=0.0787$ |                                                        |         |         |         |         |         |         |         |
| 0.70486                                                             | 96.301                                                 | 109.153 | 122.888 | 136.969 | 151.623 | 166.607 | 181.791 | 197.468 |
| 0.98629                                                             | 95.923                                                 | 108.998 | 122.623 | 136.710 | 151.269 | 166.159 | 181.327 | 196.853 |
| 1.26669                                                             | 95.712                                                 | 108.752 | 122.324 | 136.375 | 150.853 | 165.705 | 180.807 | 196.053 |
| 1.60511                                                             | 95.478                                                 | 108.496 | 122.031 | 136.059 | 150.287 | 165.106 | 180.126 | 195.650 |
| 2.49054                                                             | 95.079                                                 | 108.011 | 121.469 | 135.396 | 149.733 | 164.423 | 179.303 | 194.710 |
| 3.09672                                                             | 94.709                                                 | 107.584 | 120.974 | 134.843 | 149.124 | 163.752 | 178.668 | 193.903 |
| 3.71987                                                             | 94.373                                                 | 107.195 | 120.545 | 134.250 | 148.467 | 163.093 | 177.794 | 193.231 |
| 4.40905                                                             | 94.068                                                 | 106.846 | 120.132 | 133.891 | 148.064 | 162.588 | 177.356 | 192.493 |
| 5.15316                                                             | 93.799                                                 | 106.522 | 119.776 | 133.446 | 147.592 | 162.063 | 176.503 | 191.478 |



| $T/K$                                                                    |                                                            |         |         |         |         |         |         |         |
|--------------------------------------------------------------------------|------------------------------------------------------------|---------|---------|---------|---------|---------|---------|---------|
|                                                                          | 278.15                                                     | 283.15  | 288.15  | 293.15  | 298.15  | 303.15  | 308.15  | 313.15  |
| $10^3 \cdot m/ \text{mol} \cdot \text{kg}^{-1}$                          | $\Lambda/\text{S} \cdot \text{cm}^2 \cdot \text{mol}^{-1}$ |         |         |         |         |         |         |         |
| CsCl, $b/\text{kg}^2 \cdot \text{dm}^{-3} \cdot \text{mol}^{-1} = 0.128$ |                                                            |         |         |         |         |         |         |         |
| 1.86104                                                                  |                                                            |         |         |         |         | 164.141 | 179.059 | 194.385 |
| 2.18934                                                                  | 95.105                                                     | 107.654 | 121.008 | 134.815 | 149.100 | 163.715 | 178.624 | 193.944 |
| 2.55725                                                                  | 94.836                                                     | 107.500 | 120.842 | 134.638 | 148.859 | 163.437 | 178.303 | 193.555 |
| 2.94186                                                                  | 94.597                                                     | 107.285 | 120.602 | 134.371 | 148.576 | 163.133 | 178.018 | 193.197 |
| 3.34173                                                                  | 94.412                                                     | 107.146 | 120.398 | 134.121 | 148.322 | 162.870 | 177.678 | 192.893 |
| 3.77338                                                                  | 94.173                                                     | 106.907 | 120.165 | 133.868 | 147.988 | 162.472 | 177.238 | 192.380 |
| 4.16262                                                                  | 94.030                                                     | 106.746 | 119.936 | 133.613 | 147.710 | 162.188 | 176.943 | 192.013 |
| 4.57387                                                                  | 93.873                                                     | 106.543 | 119.726 | 133.369 | 147.437 | 161.869 | 176.615 | 191.658 |
| 4.96688                                                                  | 93.739                                                     | 106.373 | 119.533 | 133.131 | 147.140 | 161.559 | 176.292 |         |
| 5.38962                                                                  | 93.560                                                     | 106.196 | 119.320 | 132.923 | 146.940 | 161.296 |         |         |
| NaI, $b/\text{kg}^2 \cdot \text{dm}^{-3} \cdot \text{mol}^{-1} = 0.114$  |                                                            |         |         |         |         |         |         |         |
| 0.27622                                                                  | 78.260                                                     | 89.203  | 100.849 | 112.989 | 125.612 | 138.683 | 152.137 | 165.818 |
| 0.60118                                                                  | 77.807                                                     | 88.927  | 100.541 | 112.673 | 124.868 | 137.812 | 151.171 | 164.774 |
| 0.95105                                                                  | 77.629                                                     | 88.491  | 100.107 | 112.237 | 124.590 | 137.693 | 150.902 | 164.398 |
| 1.29685                                                                  | 77.187                                                     | 88.191  | 99.701  | 111.833 | 124.224 | 137.096 | 150.277 | 163.828 |
| 1.68366                                                                  | 76.930                                                     | 87.891  | 99.389  | 111.375 | 123.832 | 136.681 | 149.263 | 162.707 |
| 2.03231                                                                  | 76.846                                                     | 87.783  | 99.263  | 111.200 | 123.372 | 135.852 | 149.010 | 162.542 |
| 2.59018                                                                  | 76.599                                                     | 87.508  | 98.758  | 110.442 | 123.105 | 135.465 | 148.531 | 161.964 |
| 3.1263                                                                   | 76.085                                                     | 87.094  | 98.390  | 110.172 | 122.846 | 135.145 | 148.166 | 161.610 |
| 3.83012                                                                  | 76.093                                                     | 86.921  | 98.233  | 110.039 | 122.215 | 134.829 | 147.810 | 161.164 |
| 4.54204                                                                  | 75.922                                                     | 86.643  | 97.933  | 109.753 | 121.813 | 134.426 | 147.358 | 160.679 |
| 5.19619                                                                  | 75.704                                                     | 86.450  | 97.595  | 109.497 | 121.575 | 134.061 | 146.920 | 160.087 |
| 5.88908                                                                  | 75.294                                                     | 86.029  | 97.318  | 108.954 | 121.111 | 133.656 | 146.543 | 159.157 |
| 6.56961                                                                  | 75.270                                                     | 85.910  | 97.088  | 108.834 | 120.896 | 133.336 | 145.537 | 158.867 |
| KI, $b/\text{kg}^2 \cdot \text{dm}^{-3} \cdot \text{mol}^{-1} = 0.121$   |                                                            |         |         |         |         |         |         |         |
| 0.25832                                                                  |                                                            |         |         |         | 149.297 |         |         |         |
| 0.49864                                                                  |                                                            |         |         |         | 148.261 |         |         |         |
| 0.75566                                                                  |                                                            |         |         |         | 148.173 |         |         |         |
| 1.03926                                                                  |                                                            |         |         |         | 147.653 |         |         |         |
| 1.30903                                                                  |                                                            |         |         |         | 147.338 |         |         |         |
| 1.60955                                                                  |                                                            |         |         |         | 146.539 |         |         |         |
| 1.89571                                                                  |                                                            |         |         |         | 146.370 |         |         |         |
| 2.30195                                                                  |                                                            |         |         |         | 146.099 |         |         |         |
| 2.74739                                                                  |                                                            |         |         |         | 145.860 |         |         |         |
| 3.24475                                                                  |                                                            |         |         |         | 145.619 |         |         |         |
| 3.70564                                                                  |                                                            |         |         |         | 145.241 |         |         |         |
| 4.17498                                                                  |                                                            |         |         |         | 144.944 |         |         |         |
| 4.67710                                                                  |                                                            |         |         |         | 144.670 |         |         |         |
| 5.30234                                                                  |                                                            |         |         |         | 144.367 |         |         |         |

|                                                                    | $T/K$                                                  |         |         |         |         |         |         |         |
|--------------------------------------------------------------------|--------------------------------------------------------|---------|---------|---------|---------|---------|---------|---------|
|                                                                    | 278.15                                                 | 283.15  | 288.15  | 293.15  | 298.15  | 303.15  | 308.15  | 313.15  |
| $10^3 \cdot m/ \text{mol}\cdot\text{kg}^{-1}$                      | $\Lambda/\text{S}\cdot\text{cm}^2\cdot\text{mol}^{-1}$ |         |         |         |         |         |         |         |
| CsI , $b/\text{kg}^2\cdot\text{dm}^{-3}\cdot\text{mol}^{-1}=0.201$ |                                                        |         |         |         |         |         |         |         |
| 0.2244                                                             | 97.541                                                 | 110.562 | 123.937 | 137.370 | 152.223 | 166.908 | 181.890 | 197.106 |
| 0.46177                                                            | 97.150                                                 | 110.102 | 123.506 | 137.416 | 151.696 | 165.898 | 180.905 | 196.126 |
| 0.71291                                                            | 96.944                                                 | 109.624 | 122.992 | 136.845 | 151.098 | 165.702 | 180.549 | 195.382 |
| 1.0383                                                             | 96.469                                                 | 109.346 | 122.698 | 136.503 | 150.718 | 165.280 | 180.149 | 195.174 |
| 1.38775                                                            | 96.232                                                 | 109.047 | 122.345 | 136.097 | 150.268 | 164.727 | 179.148 | 194.186 |
| 1.74053                                                            | 96.011                                                 | 108.774 | 122.038 | 135.450 | 149.602 | 163.970 | 178.701 | 193.603 |
| 2.08942                                                            | 95.843                                                 | 108.556 | 121.462 | 135.206 | 149.295 | 163.628 | 178.314 | 193.353 |
| 2.48367                                                            | 95.388                                                 | 108.066 | 121.237 | 134.844 | 149.060 | 163.416 | 177.949 | 192.934 |
| 2.92189                                                            | 95.150                                                 | 107.824 | 121.024 | 134.639 | 148.574 | 162.867 | 177.451 | 192.372 |
| 3.41216                                                            | 94.971                                                 | 107.619 | 120.708 | 134.280 | 148.150 | 162.501 | 177.146 | 191.871 |
| 4.06379                                                            | 94.777                                                 | 107.392 | 120.405 | 133.968 | 147.851 | 162.087 | 176.583 | 191.460 |
| 4.74312                                                            | 94.597                                                 | 107.120 | 120.093 | 133.559 | 147.411 | 161.604 | 176.064 | 190.342 |
| 5.58073                                                            | 94.282                                                 | 106.753 | 119.727 | 133.218 | 146.967 | 160.809 | 175.096 | 189.694 |

## References

- [1] Christopher J. Fennell, Alan Bizjak, Vojko Vlachy, Ken A. Dill, Sapna Sarupria, Sowmiarayanan Rajamani, and Shekhar Garde. Ion pairing in molecular simulations of aqueous alkali halide solutions. *J. Phys. Chem. B*, 113(44):14837–14838, 2009.
- [2] C.J. Fennell, A. Bizjak, V. Vlachy, and K.A. Dill. Ion pairing in molecular simulations of aqueous alkali halide solutions. *J. Phys. Chem. B*, 113(19):6782–6791, 2009.
- [3] H.L. Friedman. *A course in statistical mechanics*. Prentice-Hall Englewood Cliffs, NJ, 1985.
- [4] E. F. G. Herington. Recommended reference materials for the realization of physicochemical properties. section: Density. *Pure Appl. Chem.*, 45:1–9, 1976.
- [5] B. Hribar, N.T. Southall, V. Vlachy, and K.A. Dill. How ions affect the structure of water. *J. Am. Chem. Soc.*, 124(41):12302–12311, 2002.
- [6] B. Hribar-Lee, K. A. Dill, and V. Vlachy. Receptacle model of salting-in by tma ions. *J. Phys. Chem. B*, 114:15085–15091, 2010.
- [7] B. Hribar-Lee, V. Vlachy, and K. A. Dill. Modeling hofmeister effects. *Acta Chim. Slov.*, 56:196–202, 2009.
- [8] J.-C. Justice and R. M. Fuoss. Conductance of the alkali halides. vii. cesium chloride in dioxane-water mixtures at 25 °C. *J. Phys. Chem.*, 67:1707–1708, 1963.
- [9] L. Korson, W. Drost-Hansen, and F. J. Millero. Viscosity of water at various temperatures. *J. Phys. Chem.*, 73:34–39, 1969.
- [10] B. B. Owen, R. C. Miller, C. E. Miller, and H. L. Cogan. The dielectric constant of water as a function of temperature and pressure. *J. Phys. Chem.*, 65:2065–2070, 1961.

- [11] E. Renard and J.-C. Justice. A comparison of the conductimetric behavior of cesium chloride in water-tetrahydrofuran, water-dioxane, and water-1,2-dimethoxyethane mixtures. *J. Solution Chem.*, 3:633–647, 1974.
